# Supplementary material for: Novel copper(II) complexes of “short” salen homologues. Structure and magnetic properties of the tetranuclear complex [Cu2(L2)2]2 [H2L2 = phenyl-N,N ′-bis(salicylidene)methanediamine] †
Source: Royal Society of Chemistry journal article supplement (doi:10.1039/b003825n), 2000-01-01
Supplement: b003825n.doc [file b003825n.doc]

Proofs to Alessandro Pasini, Dipartimento Chimica Inorganica Metallorganica e Analitica,

Via Venezian 21, 20133 Milano, Italy. email: alessandro.pasini@unimi.it

**Novel Copper(II) Complexes of “Short” salen Homologues. Structure and Magnetic Properties of the Tetranuclear Complex [Cu2(L2)2]2**

**[L2 = 2,2’-1,1-phenylmethanediylbis(nitrilomethylidene)diphenato].**

Alessandro Pasini,*a Francesco Demartin,*b Olivo Piovesana,*c Brunetto Chiari,c Antonio Cintic and Ornella Crispu.a

a Dipartimento di Chimica Inorganica, Metallorganica e Analitica and CNR centre, via Venezian 21, 20133 Milano, Italy. alessandro.pasini@unimi.it

b Dipartimento di Chimica Strutturale e Stereochimica Inorganica, via Venezian 21, 20133, Milano, Italy. demartin@csmtbo.mi.cnr.it

c Dipartimento di Chimica, via Elce di sotto 8, 06100 Perugia Italy. piovol@unipg.it

**SUPPLEMENTARY INFORMATION**

| Table S1. Elemental analyses (%) of some ligands and molecular weight of the complexes (required values in parentheses). | | | | |
| --- | --- | --- | --- | --- |
| Compound | C | H | N | M.W.a |
| H2L4 | 76.7 (76.7) | 5.8 (5.9) | 8.3 (8.1) |  |
| H2L5 | 67.4 (67.2) | 4.5 (4.6) | 11.3 (11.2) |  |
| [Cu2L12] | 57.2 (57.1) | 4.0 (3.8) | 9.0 (8.9) | 640 (631.64) |
| [Cu2L22] | 64.5 (64.4) | 4.0 (4.1) | 7.2 (7.2) | 710 (783.84) |
| [Cu2L32] | 59.3 (59.2) | 3.5 (3.6) | 6.5 (6.6) | 810 (852.72) |
| [Cu2L42] | 65.2 (65.1) | 4.4 (4.5) | 6.8 (6.9) | 720 (811.88) |
| [Cu2L52] | 57.7 (57.7) | 3.5 (3.5) | 9.5 (9.6) | b |
| a Osmometry, CHCl3 solutions. b The molecular weight of this compound could not be determined because of its poor solubility. | | | | |

Table S2. Selected interatomic distances (Å) and angles (°)

Cu1A-Cu2A 3.215(1) Cu1B-Cu2B 3.242(1)

Cu2A-Cu2B 3.181(1)

Cu1A-O1A 1.870(3) Cu1B-O1B 1.889(4)

Cu1A-O2A 1.867(4) Cu1B-O2B 1.884(4)

Cu1A-N1A 1.994(3) Cu1B-N1B 1.996(3)

Cu1A-N2A 1.984(3) Cu1B-N2B 1.985(3)

Cu2A-O3A 1.892(3) Cu2B-O3B 1.899(3)

Cu2A-O4A 1.904(3) Cu2B-O4B 1.890(3)

Cu2A-N3A 2.004(4) Cu2B-N3B 2.027(4)

Cu2A-N4A 2.033(4) Cu2B-N4B 2.001(4)

Cu2A-O3B 2.520(4)

O1A-C1A 1.303(5) O1B-C1B 1.308(5)

O2A-C8A 1.306(5) O2B-C8B 1.312(5)

O3A-C15A 1.302(6) O3B-C15B 1.312(6)

O4A-C22A 1.303(7) O4B-C22B 1.308(6)

O4A-Cu2B 2.452(4)

N1A-C7A 1.289(5) N1B-C7B 1.288(5)

N1A-C29A 1.474(6) N1B-C29B 1.487(6)

N2A-C14A 1.289(5) N2B-C14B 1.296(5)

N2A-C36A 1.478(6) N2B-C36B 1.509(7)

N3A-C21A 1.275(6) N3B-C21B 1.278(6)

N3A-C36A 1.476(5) N3B-C36B 1.489(4)

N4A-C28A 1.277(6) N4B-C28B 1.287(6)

N4A-C29A 1.481(4) N4B-C29B 1.490(5)

C1A-C6A 1.418(6) C1B-C6B 1.419(6)

C6A-C7A 1.436(7) C6B-C7B 1.424(7)

C8A-C13A 1.400(5) C8B-C13B 1.409(6)

C13A-C14A 1.441(7) C13B-C14B 1.442(7)

C15A-C20A 1.419(6) C15B-C20B 1.422(7)

C20A-C21A 1.439(6) C20B-C21B 1.441(5)

C22A-C27A 1.422(7) C22B-C27B 1.412(7)

C27A-C28A 1.428(5) C27B-C28B 1.439(6)

Cu1A-Cu2A-O3A 102.0(1) Cu1B-Cu2B-O3B 99.2(1)

Cu1A-Cu2A-O4A 99.0(1) Cu1B-Cu2B-O4B 99.3(1)

Cu1A-Cu2A-N3A 65.6(1) Cu1B-Cu2B-N3B 64.3(1)

Cu1A-Cu2A-N4A 64.5(1) Cu1B-Cu2B-N4B 65.2(1)

O1A-Cu1A-O2A 142.7(1) O1B-Cu1B-O2B 142.9(1)

O1A-Cu1A-N1A 94.7(1) O1B-Cu1B-N1B 94.4(1)

O1A-Cu1A-N2A 99.5(1) O1B-Cu1B-N2B 98.3(1)

O2A-Cu1A-N1A 98.3(1) O2B-Cu1B-N1B 99.2(1)

O2A-Cu1A-N2A 94.5(1) O2B-Cu1B-N2B 94.9(1)

N1A-Cu1A-N2A 136.8(1) N1B-Cu1B-N2B 136.9(1)

O3A-Cu2A-O4A 158.9(1) O3B-Cu2B-O4B161.3(1)

O3A-Cu2A-N3A 94.2(1) O3B-Cu2B-N3B 93.6(1)

O3A-Cu2A-N4A 97.6(1) O3B-Cu2B-N4B 91.6(1)

O4A-Cu2A-N3A 92.2(1) O4B-Cu2B-N3B 96.4(1)

O4A-Cu2A-N4A 93.6(1) O4B-Cu2B-N4B 94.1(1)

N3A-Cu2A-N4A 130.1(1) N3B-Cu2B-N4B 129.4(1)

Cu1A-Cu2A-Cu2B 145.06(3) Cu2A-Cu2B-Cu1B 147.21(3)

Cu1A-Cu2A-O3B 164.5(1) O4A-Cu2B-Cu1B 165.1(1)

O3A-Cu2A-Cu2B 108.9(1) Cu2A-Cu2B-O4B 109.2(1)

O3A-Cu2A-O3B 86.6(1) O4A-Cu2B-O4B 87.1(1)

O4A-Cu2A-O3B 73.6(1) O4A-Cu2B-O3B 75.3(1)

N3A-Cu2A-Cu2B 95.8(1) Cu2A-Cu2B-N4B 96.3(1)

N3A-Cu2A-O3B 127.2(1) O4A-Cu2B-N4B 128.0(1)

N4A-Cu2A-Cu2B 125.0(1)Cu2A-Cu2B-N3B 125.7(1)

N4A-Cu2A-O3B 101.9(1) O4A-Cu2B-N3B 101.8(1)
